# Supplementary material
Source: MDPI journal article supplement (https://www.mdpi.com/2073-4352/14/3/261)
Supplement: s1 [file s1]

Archive with 1 entries (1 files):
- crystals-2875379-supplementary.pdf
